# Supplementary material
Source: PubMed Central journal article supplement (PMC3833826)
Supplement: NIHMS527508-supplement-ESI.pdf [file NIHMS527508-supplement-ESI.pdf]

# On-Line Supporting Information

## Silver Nanoparticles Induce Developmental Stage-Specific Embryonic Phenotypes in Zebrafish

Kerry J. Lee<sup>1†</sup>, Lauren M. Browning<sup>1†</sup>, Prakash D. Nallathamby<sup>1</sup>, Christopher J. Osgood<sup>2</sup>, and  
Xiao-Hong Nancy Xu<sup>1\*</sup>

*Department of Chemistry<sup>1</sup>, Biochemistry<sup>1</sup> and Biology<sup>2</sup>, Old Dominion University, Norfolk, VA  
23529*

**The on-line Supporting Information (SI) includes:**

**Table SI:** Summary of normal and deformed zebrafish developed from given-stage embryos acutely treated with the Ag NPs ( $13.1 \pm 2.5$  nm) for 2 h

---

<sup>†</sup> These authors contributed equally to this work.

\* To whom correspondence should be addressed: Email: [xhxu@odu.edu](mailto:xhxu@odu.edu); [www.odu.edu/sci/xu/xu.htm](http://www.odu.edu/sci/xu/xu.htm); Tel/fax: (757) 683-5698

**Table S1:** Summary of Normal and Deformed Zebrafish Developed from Given-Stage Embryos Acutely Treated with the Ag NPs ( $13.1 \pm 2.5$  nm) for 2 h

| <b>Control: Normal Development</b>                                                  |                                                                                     |                                                                                      |                                                                                       |
|-------------------------------------------------------------------------------------|-------------------------------------------------------------------------------------|--------------------------------------------------------------------------------------|---------------------------------------------------------------------------------------|
| 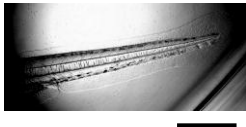   |    |    |    |
| <b>Stage I</b>                                                                      |                                                                                     |                                                                                      |                                                                                       |
| <b>Finfold Abnormality*</b>                                                         |                                                                                     |                                                                                      |                                                                                       |
|    |    |    |    |
| <b>Tail/Spinal Cord Flexure and Truncation*</b>                                     |                                                                                     |                                                                                      |                                                                                       |
|   |   |   |   |
| <b>Cardiac Malformation/Edema*</b>                                                  |                                                                                     |                                                                                      |                                                                                       |
|  |  |  |  |
| <b>Yolk Sac Edema*</b>                                                              |                                                                                     |                                                                                      |                                                                                       |
|  |  |  |  |
| <b>No Head*</b>                                                                     |                                                                                     |                                                                                      |                                                                                       |
|  |  |  |  |

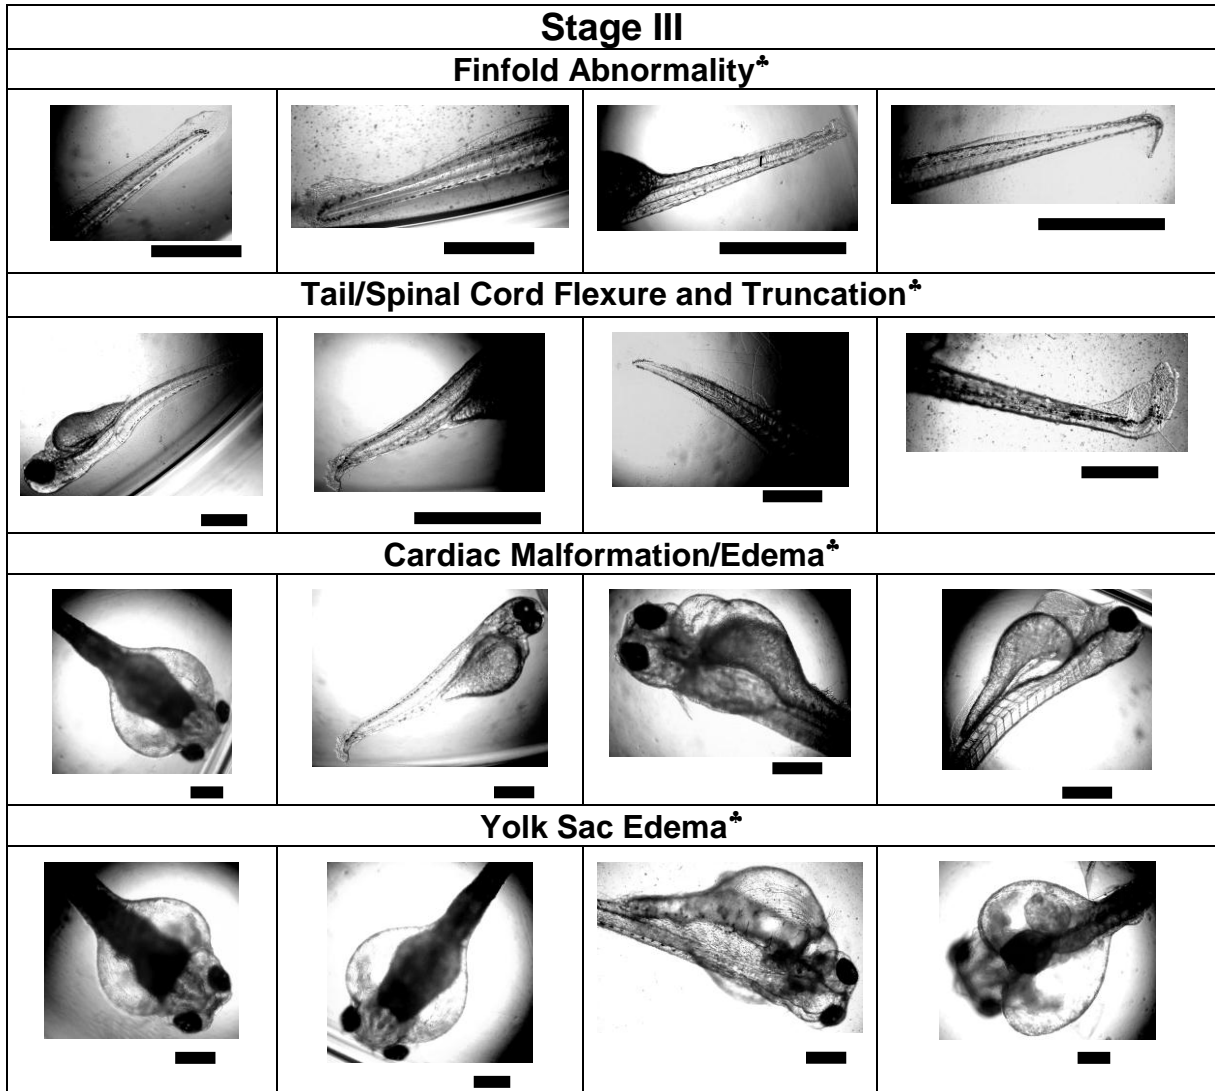

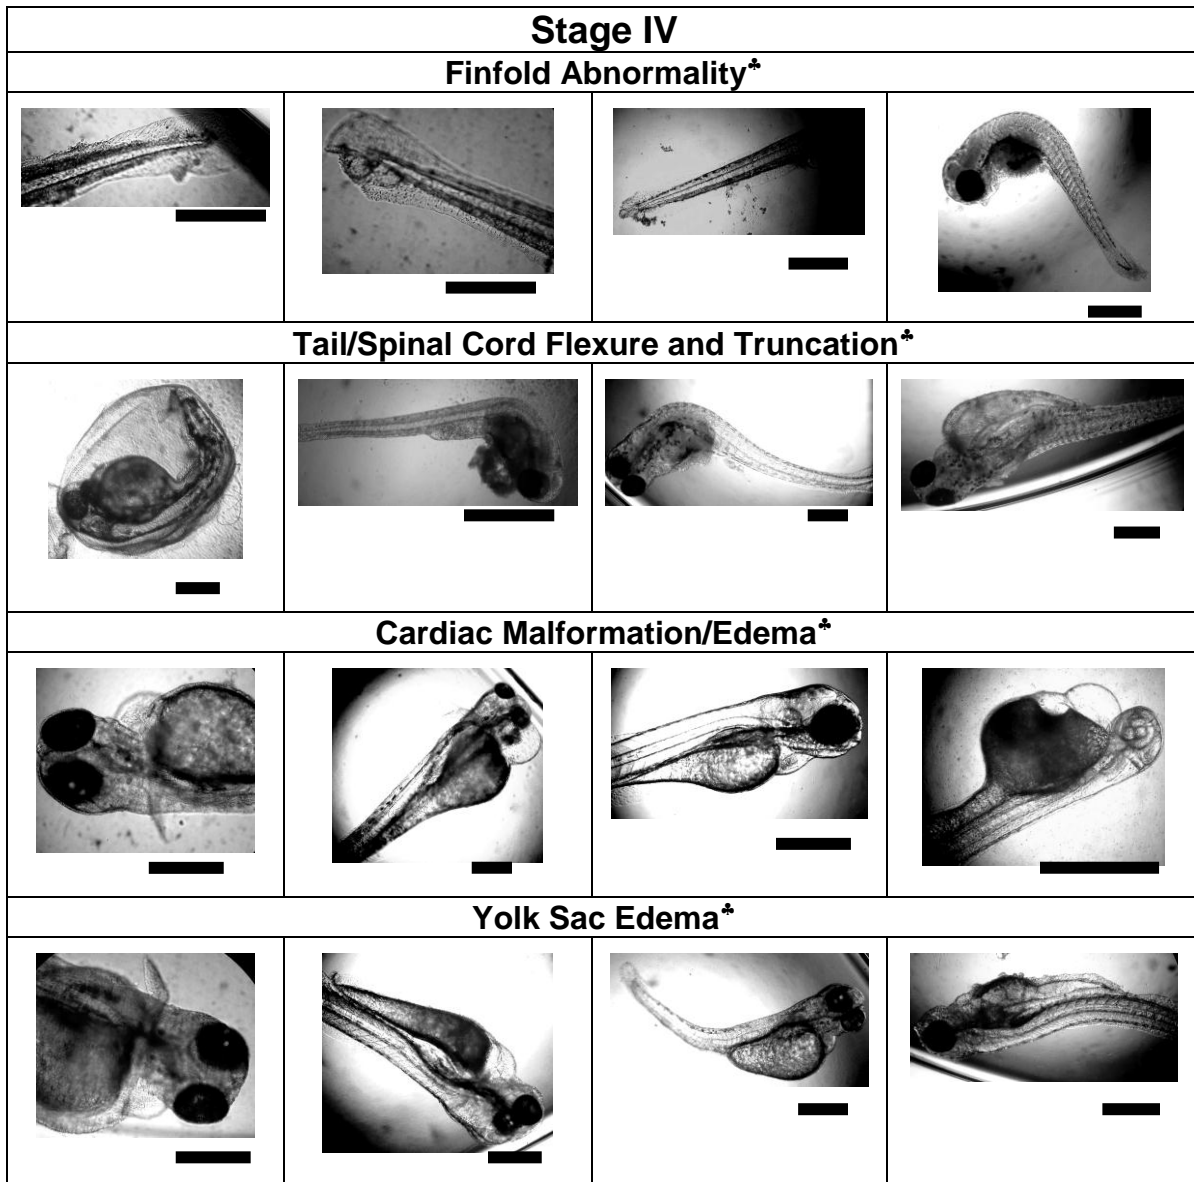

\* Multiple types of deformities observed in a zebrafish, which are repeatedly listed in respective category.  
Scale bar = 500  $\mu$ m
